# Supplementary material for: Introduction of CoCl2·6H2O into Co3O4 for enhancement of hydroxyl radicals and effective charge separation
Source: Royal Society of Chemistry journal article supplement (doi:10.1039/c5dt04175a), 2015-11-26
Supplement: c5dt04175a1.pdf [file c5dt04175a1.pdf]

**Electronic Supplementary Information (ESI) for Dalton Transactions.  
This journal is © The Royal Society of Chemistry 2015**

**Introduction of  $\text{CoCl}_2 \cdot 6\text{H}_2\text{O}$  into  $\text{Co}_3\text{O}_4$  for Enhancement of Hydroxyl  
Radicals and Effective Charges Separation**

**Ying-juan Hao, Fa-tang Li\*, Jun Zhao, Rui-hong Liu, Xiao-jing Wang, Yu-pei Li and Ying Liu**

College of Science, Hebei University of Science and Technology, 26, Yuxiang Street, Shijiazhuang,  
050018, China.

\* E-mail: [lifatang@126.com](mailto:lifatang@126.com)

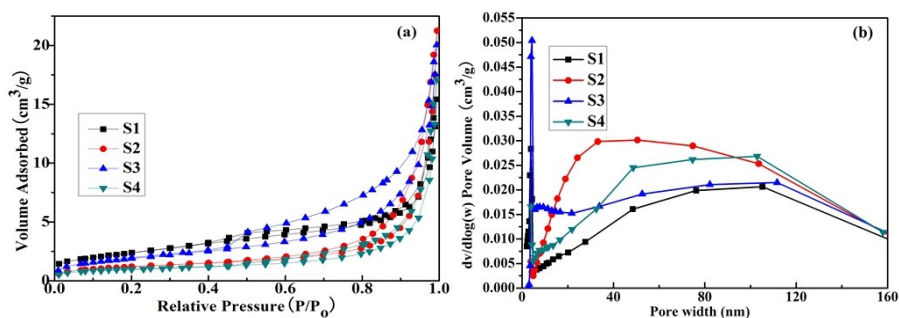

**Fig. S1.** N<sub>2</sub> adsorption-desorption curves of the obtained samples: (a) adsorption-desorption isotherms; (b) BJH pore size distribution calculated with the desorption data.

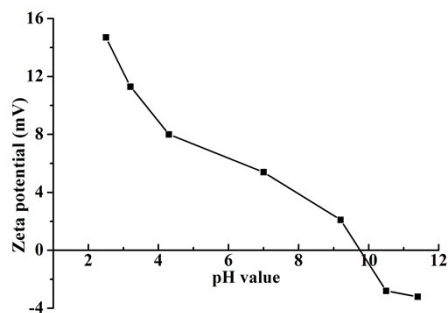

**Fig.S2.** Zeta potentials sample S3 at different pH values.

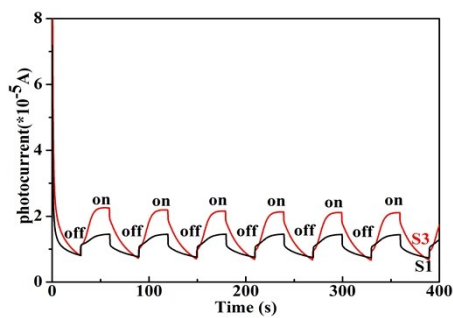

**Fig. S3.** Transient photocurrent responses of S1 and S3 electrodes.
